# Supplementary material for: Benzoquinoline Derivatives: An Attractive Approach to Newly Small Molecules with Anticancer Activity
Source: MDPI journal article supplement (doi:10.3390/ijms24098124), 2023-05-01

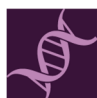

# Benzoquinoline Derivatives: An Attractive Approach to Newly Small Molecules with Anticancer Activity

Liliana Oniciuc <sup>1</sup>, Dorina Amăriucăi-Mantu <sup>1</sup>, Dumitrelea Diaconu <sup>1,2</sup>, Violeta Mangalagiu <sup>2</sup>, Ramona Danac <sup>1</sup>, Vasilichia Antoci <sup>1</sup> and Ionel I. Mangalagiu <sup>1,2,\*</sup>

<sup>1</sup> Faculty of Chemistry, Alexandru Ioan Cuza University of Iasi, 11 Carol 1st Bvd, 700506 Iasi, Romania; lili\_oniciuc@yahoo.com (L.O.); dorina.mantu@uaic.ro (D.A.-M.); dumitrelea.diaconu@uaic.ro (D.D.); rdanac@uaic.ro (R.D.); vasilichia.antoci@uaic.ro (V.A.)

<sup>2</sup> Institute of Interdisciplinary Research-CERNESIM Center, Alexandru Ioan Cuza University of Iasi, 11 Carol I, 700506 Iasi, Romania; violeta.mangalagiu@uaic.ro

\* Correspondence: ionelm@uaic.ro; Tel.: +40-232-201343

## Content

1. NMR spectra of representative compounds **6b**, **6e**, **7b**, **7d**–**5**
2. Anticancer results of all tested compounds **HybB[f]Q 6a–f** and **7a–e**–**5**
3. CheckCIF files for X-ray data of compounds **6c** and **7c**–**10**–**17**

1. NMR spectra of representative compounds **6b**, **6e**, **7b**, **7d**

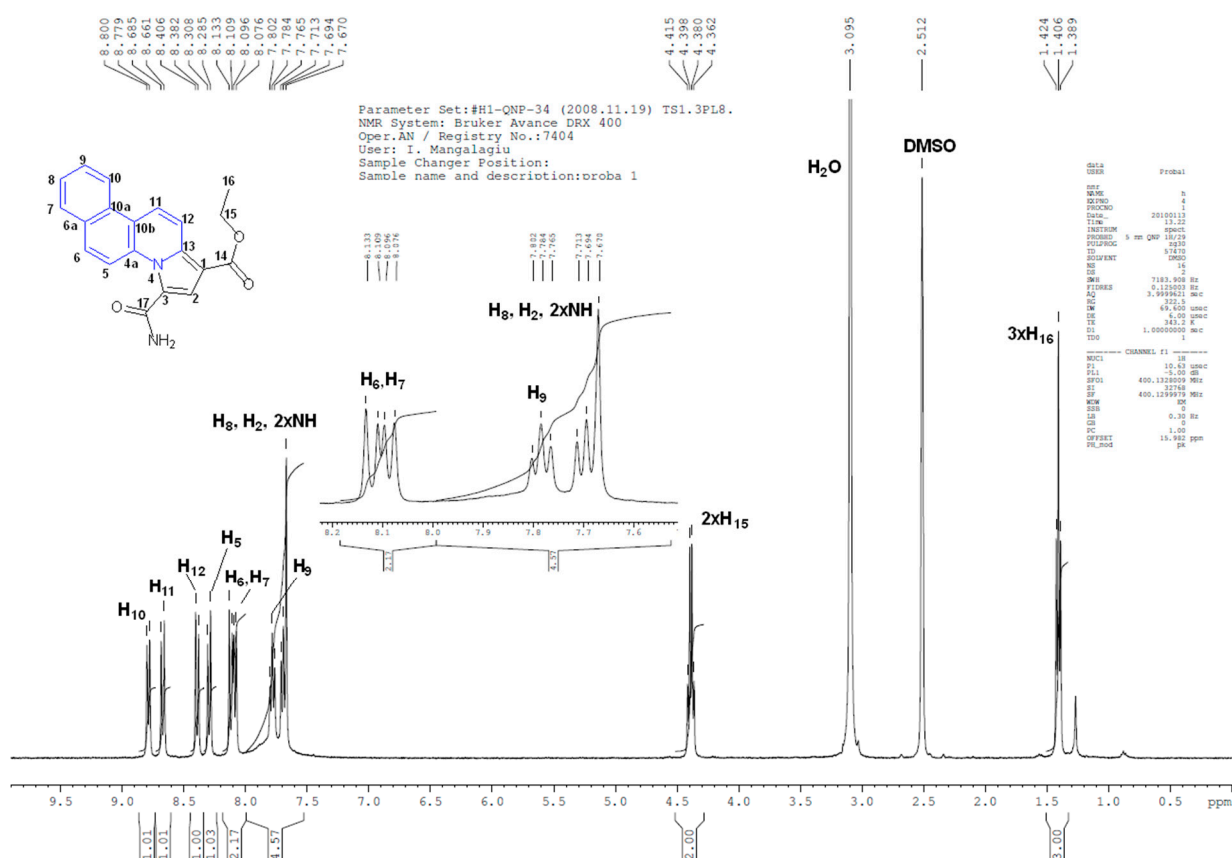

Figure S1. <sup>1</sup>H-NMR spectrum of ethyl 3-carbamoylbenzo[f]pyrrolo[1,2-a]quinoline-1-carboxylate (**6b**).

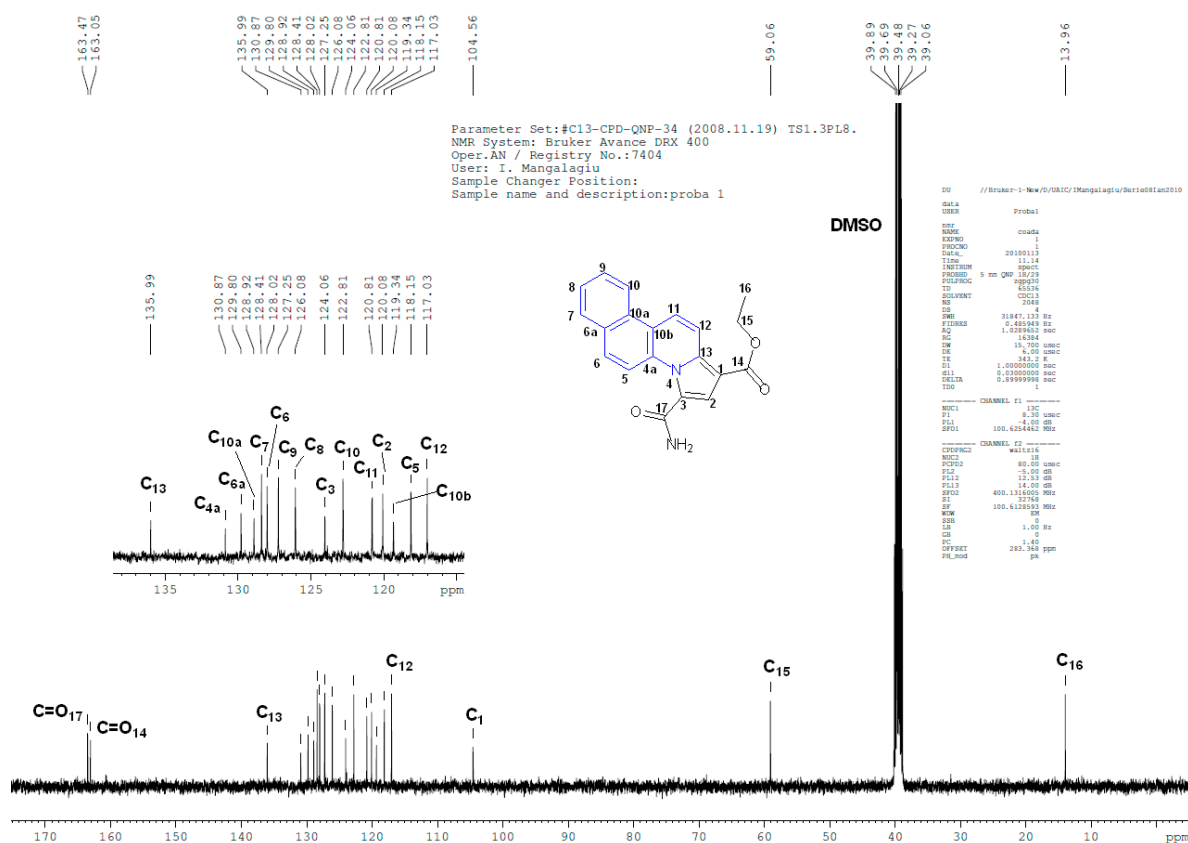

**Figure S2.**  $^{13}\text{C}$ -NMR spectrum of ethyl 3-carbamoylbenzo[f]pyrrolo[1,2-a]quinoline-1-carboxylate (**6b**).

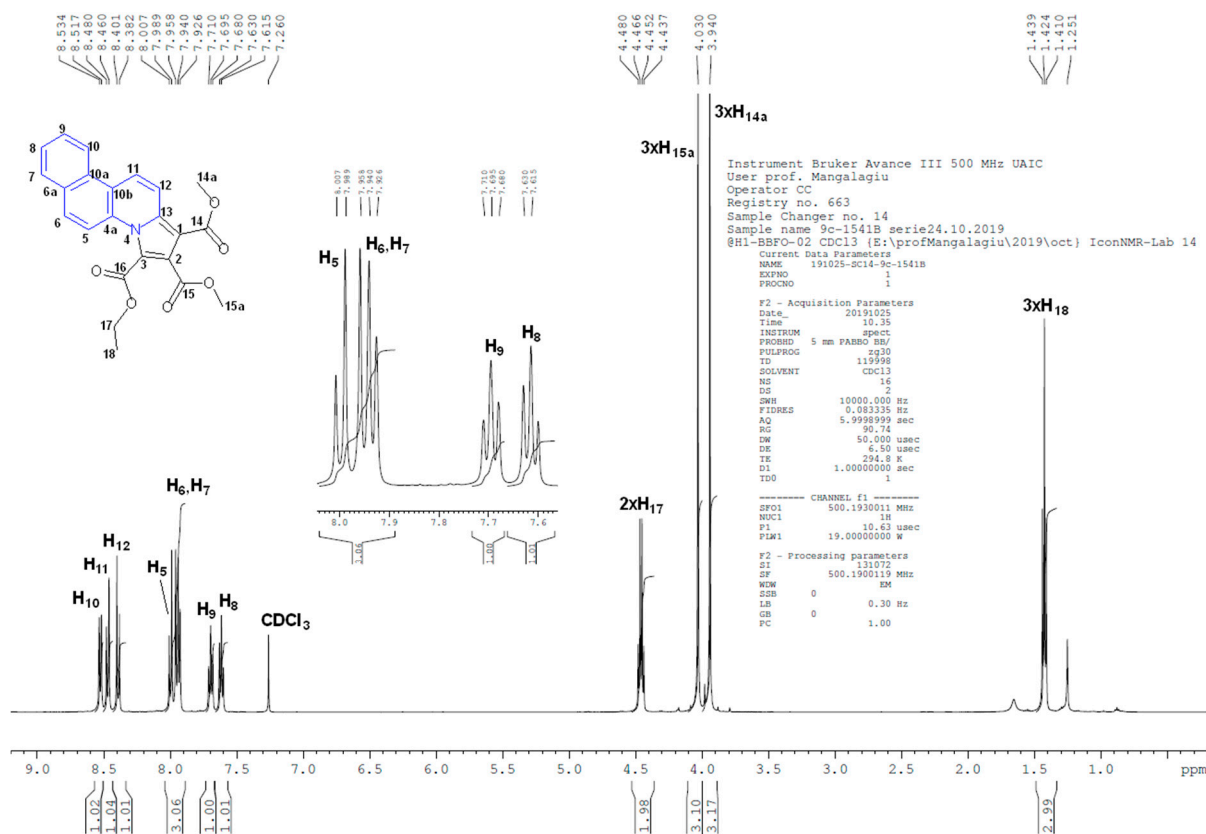

**Figure S3.** <sup>1</sup>H-NMR spectrum of 3-ethyl 1,2-dimethyl benzo[f]pyrrolo[1,2-a]quinoline-1,2,3-tricarboxylate (**6e**).

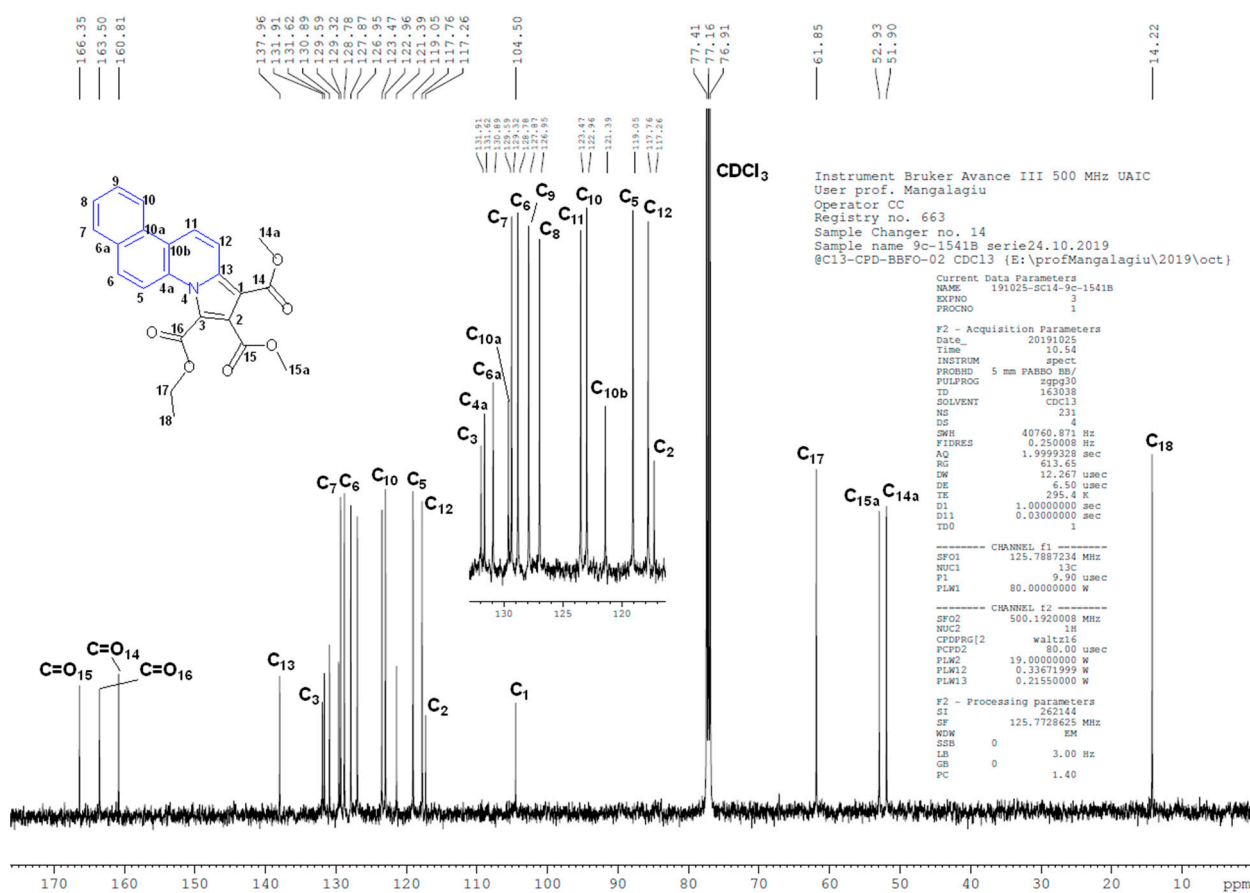

Figure S4. <sup>13</sup>C-NMR spectrum of 3-ethyl 1,2-dimethyl benzo[f]pyrrolo[1,2-a]quinoline-1,2,3-tricarboxylate (6e).

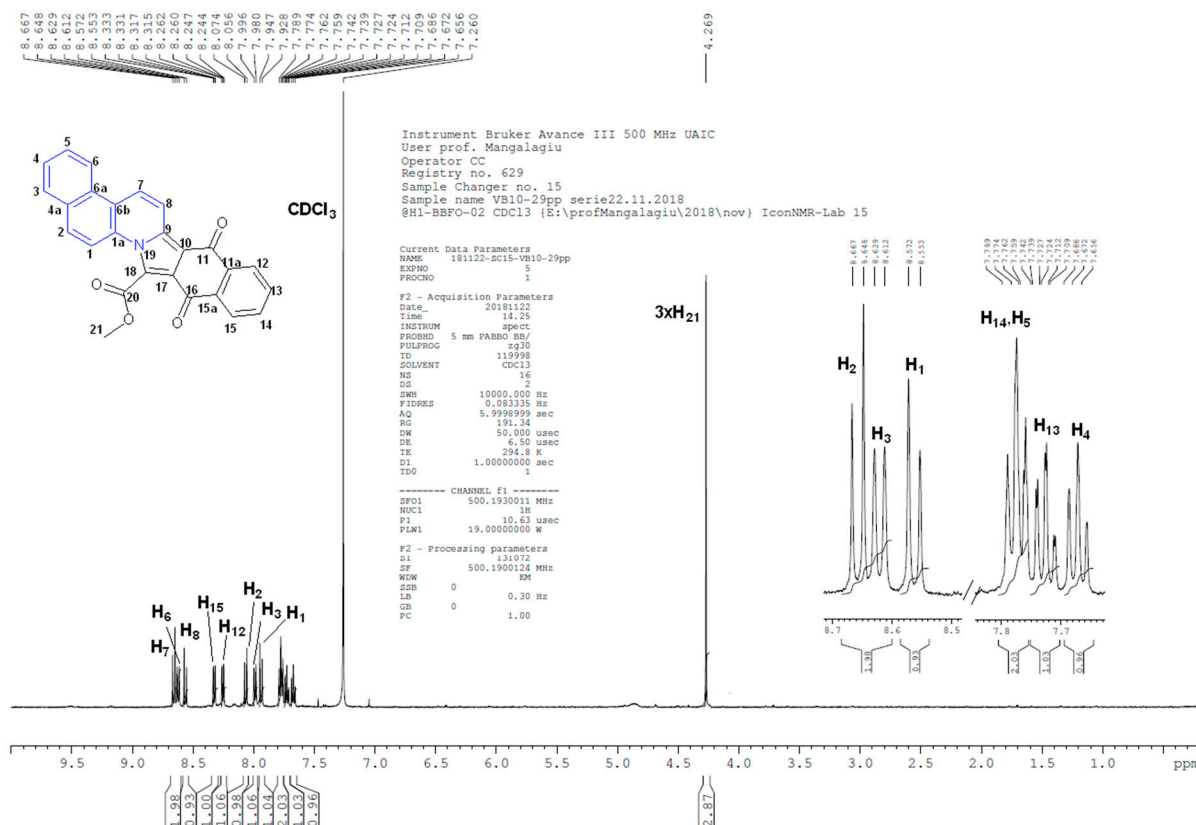

Figure S5. <sup>1</sup>H-NMR spectrum of methyl 9,14-dioxo-9,14-dihydrobenzo[f]benzo[5,6]isoindolo[2,1-a]quinoline-15-carboxylate (7b).

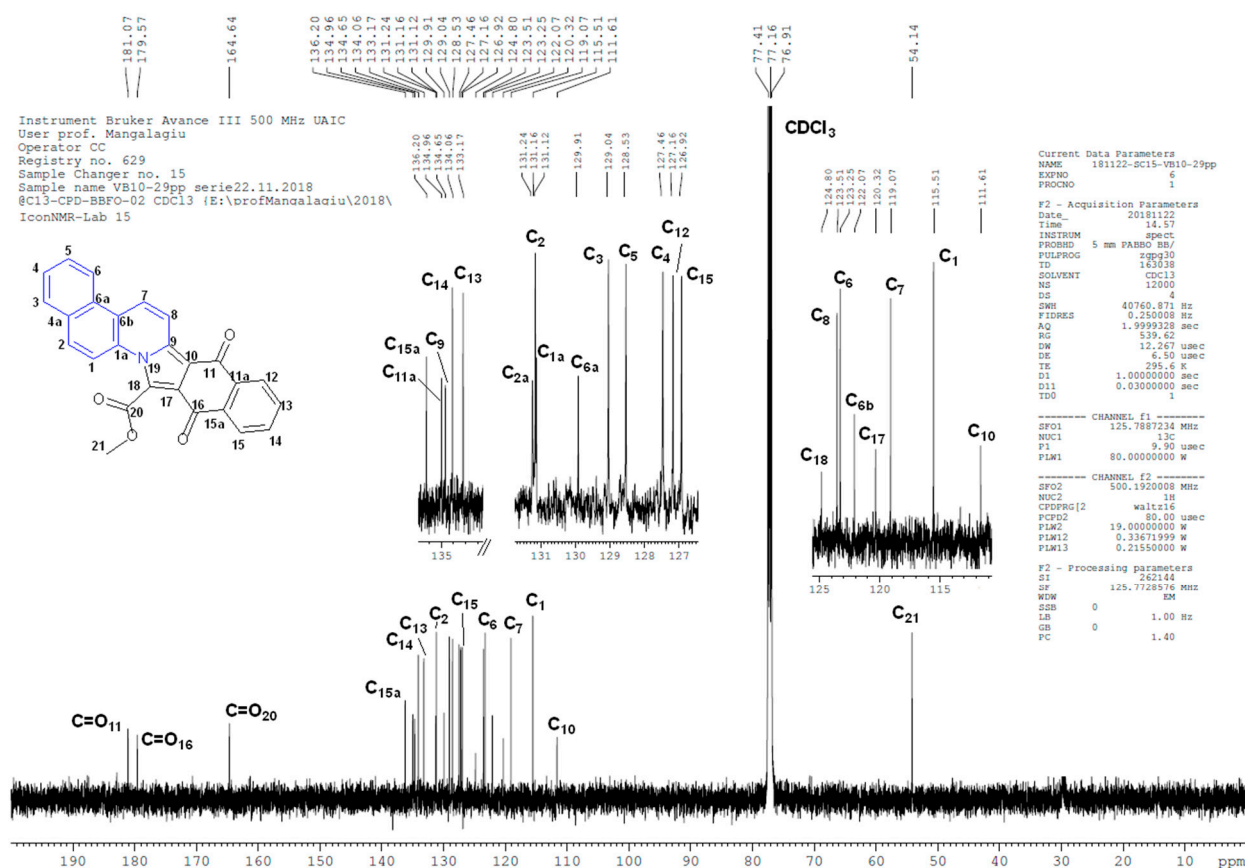

**Figure S6.**  $^{13}\text{C}$ -NMR spectrum of methyl 9,14-dioxo-9,14-dihydrobenzo[f]benzo[5,6]isoindolo[2,1-a]quinoline-15-carboxylate (**7b**).

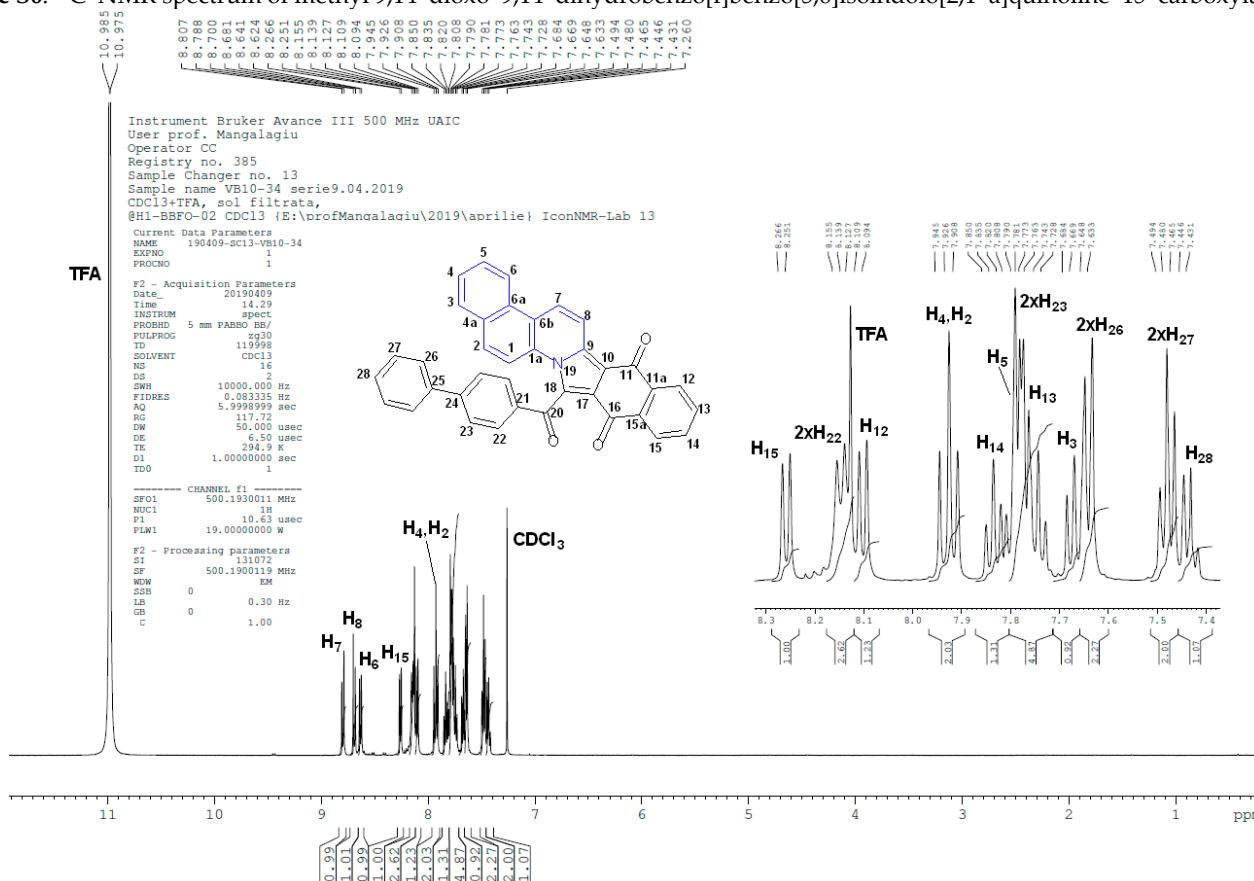

**Figure S7.** <sup>1</sup>H-NMR spectrum of 15-([1,1'-biphenyl]-4-carbonyl)benzo[f]benzo[5,6]isoindolo[2,1-a]quinoline-9,14-dione (**7d**).

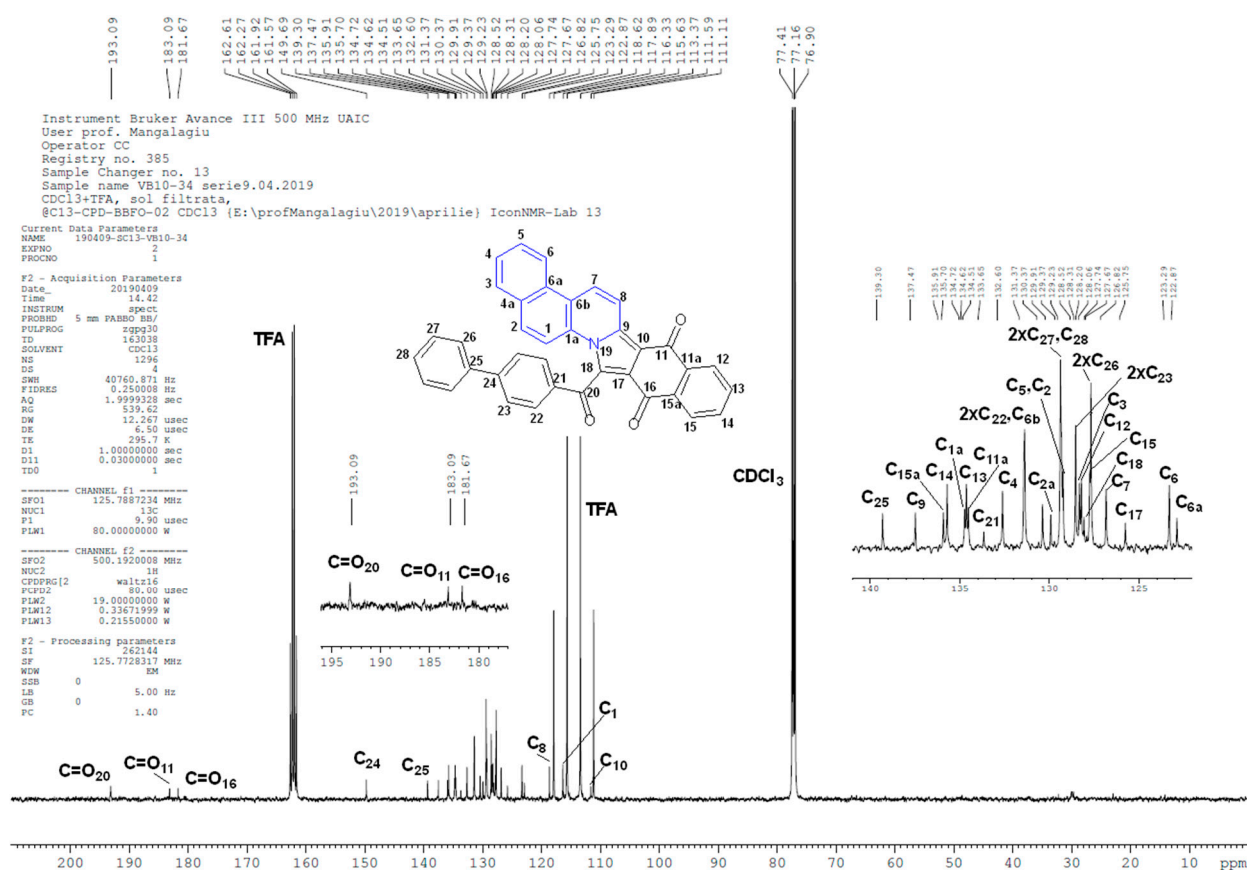

Figure S8.  $^{13}\text{C}$ -NMR spectrum of 15-([1,1'-biphenyl]-4-carbonyl)benzo[f]benzo[5,6]isoindolo[2,1-a]quinoline-9,14-dione (**7d**).

## 2. Anticancer results of all tested compounds HybB[f]Q **6a–f** and **7a–e**

Table S1. Percentage growth inhibition (PGI %,  $\mu\text{M}$ )<sup>a</sup> of salts **3a–g** against the NCI 60 human cancer cell lines in the single-dose assay.

| Cell type                         | Salts / Growth inhibition percent (PGI%) <sup>a</sup> |    |    |                     |    |                      |    |
|-----------------------------------|-------------------------------------------------------|----|----|---------------------|----|----------------------|----|
|                                   | 3a                                                    | 3b | 3c | 3d                  | 3e | 3f                   | 3g |
| <i>Leukemia</i>                   |                                                       |    |    |                     |    |                      |    |
| CCRF-CEM                          | 0                                                     | 3  | 4  | 72                  | 48 | 68                   | 41 |
| HL-60 (TB)                        | 0                                                     | 20 | 0  | 99                  | 78 | 100(62) <sup>b</sup> | 70 |
| K-562                             | 0                                                     | 34 | 5  | 92                  | 84 | 100(26) <sup>b</sup> | 83 |
| MOLT-4                            | 0                                                     | 33 | 0  | 86                  | 68 | 100(3) <sup>b</sup>  | 67 |
| RPMI-8226                         | 0                                                     | 40 | 9  | 95                  | 75 | 93                   | 67 |
| SR                                | 4                                                     | 40 | 15 | 98                  | 66 | 100(28) <sup>b</sup> | 88 |
| <i>Non-small Cell Lung Cancer</i> |                                                       |    |    |                     |    |                      |    |
| A549/ATCC                         | 0                                                     | 9  | 3  | 76                  | 62 | 59                   | 43 |
| EKVX                              | 11                                                    | 10 | 12 | 71                  | 57 | 59                   | 43 |
| HOP-62                            | 0                                                     | 0  | 4  | 64                  | 56 | 56                   | 28 |
| HOP-92                            | 0                                                     | 15 | 0  | 100(8) <sup>b</sup> | 88 | 93                   | 87 |
| NCI-H226                          | 9                                                     | 22 | 19 | 64                  | 41 | -                    | 32 |
| NCI-H23                           | 2                                                     | 29 | 3  | 73                  | 72 | 56                   | 41 |
| NCI-H322M                         | 0                                                     | 5  | 0  | 57                  | 31 | 36                   | 37 |

|                       |    |    |    |                            |                            |                            |           |
|-----------------------|----|----|----|----------------------------|----------------------------|----------------------------|-----------|
| NCI-460               | 0  | 0  | 0  | <b>96</b>                  | <b>81</b>                  | 73                         | 46        |
| NCI-H522              | 0  | 11 | 4  | 78                         | 71                         | 64                         | 25        |
| <b>Colon Cancer</b>   |    |    |    |                            |                            |                            |           |
| COLO 205              | 0  | 7  | 0  | <b>94</b>                  | 74                         | 75                         | 53        |
| HCC-2998              | 1  | 0  | 0  | <b>83</b>                  | 52                         | <b>88</b>                  | 54        |
| HCT-116               | 0  | 48 | 1  | <b>88</b>                  | 70                         | <b>85</b>                  | <b>81</b> |
| HCT-15                | 0  | 0  | 0  | 43                         | 13                         | 47                         | 23        |
| HT29                  | 0  | 0  | 0  | <b>88</b>                  | <b>80</b>                  | <b>87</b>                  | 79        |
| KM12                  | 0  | 15 | 5  | 74                         | 65                         | 72                         | 23        |
| SW-620                | 0  | 3  | 0  | <b>81</b>                  | 64                         | 72                         | 51        |
| <b>CNS Cancer</b>     |    |    |    |                            |                            |                            |           |
| SF-268                | 0  | 26 | 18 | 57                         | 62                         | 52                         | 16        |
| SF-295                | 0  | 5  | 0  | 77                         | 70                         | 66                         | 53        |
| SF-539                | 1  | 23 | 9  | 75                         | 47                         | 39                         | 65        |
| SNB-19                | 0  | 32 | 24 | 74                         | 68                         | 74                         | 44        |
| SNB-75                | 3  | 13 | 2  | 57                         | 18                         | 29                         | 2         |
| U251                  | 3  | 40 | 28 | <b>82</b>                  | 72                         | 70                         | 46        |
| <b>Melanoma</b>       |    |    |    |                            |                            |                            |           |
| LOX IMVI              | 5  | 9  | 4  | <b>100(24)<sup>b</sup></b> | 54                         | <b>89</b>                  | <b>82</b> |
| MALME-3M              | 6  | 32 | 4  | <b>87</b>                  | 66                         | 57                         | 35        |
| M14                   | 0  | 21 | 1  | <b>83</b>                  | 62                         | 76                         | 39        |
| MDA-MB-435            | 0  | 33 | 0  | <b>87</b>                  | 63                         | 61                         | 38        |
| SK-MEL-2              | 0  | 0  | 0  | 64                         | 44                         | 37                         | 13        |
| SK-MEL-28             | 0  | 6  | 0  | 56                         | 33                         | 26                         | 21        |
| SK-MEL-5              | 0  | 63 | 21 | <b>100(89)<sup>b</sup></b> | <b>100(32)<sup>b</sup></b> | <b>100(35)<sup>b</sup></b> | 62        |
| UACC-257              | 0  | 8  | 0  | <b>95</b>                  | <b>85</b>                  | 47                         | 48        |
| UACC-62               | 1  | 43 | 8  | 68                         | 44                         | 34                         | 36        |
| <b>Ovarian Cancer</b> |    |    |    |                            |                            |                            |           |
| IGROV1                | 0  | 14 | 0  | 69                         | 33                         | 52                         | 51        |
| OVCAR-3               | 0  | 36 | 0  | 70                         | 48                         | 69                         | 37        |
| OVCAR-4               | 0  | 39 | 4  | <b>80</b>                  | 67                         | <b>91</b>                  | 37        |
| OVCAR-5               | 0  | 0  | 3  | 69                         | 42                         | 42                         | 47        |
| OVCAR-8               | 0  | 1  | 0  | 78                         | 74                         | 74                         | 49        |
| NCI/ADR-RES           | 0  | 0  | 0  | 19                         | 2                          | 14                         | 13        |
| SK-OV-3               | 0  | 12 | 2  | 66                         | 50                         | 47                         | 27        |
| <b>Renal Cancer</b>   |    |    |    |                            |                            |                            |           |
| 786-0                 | 0  | 13 | 2  | 66                         | 33                         | 46                         | 48        |
| A498                  | 0  | 0  | 0  | 25                         | 0                          | 0                          | 0         |
| ACHN                  | 0  | 0  | 0  | 50                         | 21                         | 44                         | 33        |
| CAKI-1                | 10 | 12 | 4  | 47                         | 21                         | 67                         | 27        |
| RXF 393               | 1  | 0  | 0  | <b>94</b>                  | 44                         | 68                         | 46        |
| SN12C                 | 0  | 15 | 6  | <b>85</b>                  | <b>83</b>                  | 74                         | 46        |



|                        |    |           |           |                            |           |                            |    |
|------------------------|----|-----------|-----------|----------------------------|-----------|----------------------------|----|
| TK-10                  | 0  | 0         | 0         | 59                         | 27        | 31                         | 35 |
| UO-31                  | 21 | 16        | 16        | 70                         | 44        | 71                         | 68 |
| <b>Prostate Cancer</b> |    |           |           |                            |           |                            |    |
| PC-3                   | 9  | 29        | 2         | <b>81</b>                  | 73        | 86                         | 64 |
| DU-145                 | 0  | 0         | 0         | 64                         | 44        | 58                         | 32 |
| <b>Breast Cancer</b>   |    |           |           |                            |           |                            |    |
| MCF7                   | 4  | 39        | 13        | <b>88</b>                  | <b>82</b> | <b>90</b>                  | 61 |
| MDA-MB-231/ATCC        | 0  | 21        | 0         | 76                         | 60        | 58                         | 48 |
| HS 578T                | 0  | 12        | 1         | 73                         | 41        | 56                         | 32 |
| BT-549                 | 0  | 0         | 0         | 79                         | 67        | 44                         | 32 |
| T-47D                  | 0  | 10        | 3         | 56                         | 62        | 64                         | 35 |
| MDA-MB-468             | 17 | <b>85</b> | <b>76</b> | <b>100(10)<sup>b</sup></b> | <b>97</b> | <b>100(10)<sup>b</sup></b> | 69 |

<sup>a</sup>The number reported for the one-dose assay, percentage growth inhibition (PGI), is growth relative to the no-drug control, and relative to the time zero number of cells; <sup>b</sup> Cytotoxic effect; lethality percent is represented in brackets; the most active compounds are highlighted in bold and red.

**Table S2.** Percentage growth inhibition (PGI %,  $\mu$ M)<sup>a</sup> of cycloadducts **6a–f** and **7a–e** against the NCI 60 human cancer cell lines in the single-dose assay.

| Cell type                         | Cycloadducts / Growth inhibition percent (PGI%) <sup>a</sup> |    |    |    |    |    |    |    |    |    |    |
|-----------------------------------|--------------------------------------------------------------|----|----|----|----|----|----|----|----|----|----|
|                                   | 6a                                                           | 6b | 6c | 6d | 6e | 6f | 7a | 7b | 7c | 7d | 7e |
| <b>Leukemia</b>                   |                                                              |    |    |    |    |    |    |    |    |    |    |
| CCRF-CEM                          | 26                                                           | 0  | 0  | 0  | 0  | 0  | 0  | 2  | 0  | 0  | 0  |
| HL-60 (TB)                        | 0                                                            | 0  | 0  | 0  | 3  | 0  | 0  | 1  | 0  | 0  | 0  |
| K-562                             | 17                                                           | 0  | 0  | 0  | 0  | 0  | 0  | 0  | 0  | 0  | 0  |
| MOLT-4                            | 10                                                           | 0  | 0  | 3  | 0  | 0  | 0  | 0  | 0  | 0  | 0  |
| RPMI-8226                         | 33                                                           | 0  | 0  | 13 | 0  | 2  | 0  | 0  | 0  | 0  | 0  |
| SR                                | 28                                                           | 24 | 5  | 20 | 20 | 5  | 4  | 9  | 6  | 0  | 0  |
| <b>Non-small Cell Lung Cancer</b> |                                                              |    |    |    |    |    |    |    |    |    |    |
| A549/ATCC                         | 0                                                            | 0  | 3  | 0  | 0  | 0  | 0  | 0  | 0  | 7  | 0  |
| EKVX                              | 8                                                            | 0  | 3  | 20 | 0  | 0  | 3  | 3  | 0  | 0  | 3  |
| HOP-62                            | 0                                                            | 0  | 0  | 20 | 0  | 7  | 0  | 8  | 0  | 1  | 8  |
| HOP-92                            | 25                                                           | 0  | 3  | 17 | 0  | 0  | 0  | 0  | 0  | 0  | 1  |
| NCI-H226                          | 32                                                           | 0  | 0  | 22 | 13 | 20 | 0  | 8  | 0  | -  | 0  |
| NCI-H23                           | 26                                                           | 0  | 0  | 17 | 0  | 0  | 5  | 7  | 3  | 2  | 4  |
| NCI-H322M                         | 25                                                           | 0  | 0  | 0  | 0  | 0  | 0  | 1  | 2  | 0  | 0  |
| NCI-460                           | 43                                                           | 0  | 0  | 0  | 0  | 0  | 0  | 0  | 0  | 0  | 0  |
| NCI-H522                          | 6                                                            | 0  | 0  | 1  | 1  | 0  | 0  | 4  | 0  | 0  | 7  |
| <b>Colon Cancer</b>               |                                                              |    |    |    |    |    |    |    |    |    |    |
| COLO 205                          | 19                                                           | 0  | 0  | 1  | 0  | 0  | 0  | 0  | 0  | 0  | 0  |
| HCC-2998                          | 0                                                            | 0  | 0  | 0  | 0  | 0  | 0  | 0  | 0  | 4  | 0  |
| HCT-116                           | 19                                                           | 0  | 2  | 11 | 0  | 8  | 0  | 0  | 0  | 0  | 0  |
| HCT-15                            | 23                                                           | 0  | 2  | 0  | 0  | 0  | 0  | 0  | 0  | 0  | 0  |

|                        |    |   |    |    |    |    |    |    |    |    |    |
|------------------------|----|---|----|----|----|----|----|----|----|----|----|
| HT29                   | 5  | 0 | 0  | 1  | 0  | 0  | 0  | 0  | 0  | 0  | 0  |
| KM12                   | 8  | 0 | 0  | 1  | 0  | 0  | 0  | 1  | 0  | 0  | 0  |
| SW-620                 | 11 | 0 | 0  | 8  | 0  | 0  | 0  | 1  | 0  | 0  | 0  |
| <b>CNS Cancer</b>      |    |   |    |    |    |    |    |    |    |    |    |
| SF-268                 | 11 | 0 | 0  | 0  | 0  | 0  | 0  | 0  | 0  | 0  | 0  |
| SF-295                 | 15 | 0 | 7  | 16 | 1  | 8  | 0  | 3  | 0  | 0  | 1  |
| SF-539                 | 30 | 0 | 1  | 3  | 0  | 8  | 2  | 9  | 0  | 0  | 12 |
| SNB-19                 | 17 | 0 | 19 | 11 | 0  | 5  | 1  | 10 | 0  | 0  | 4  |
| SNB-75                 | 29 | 0 | 4  | 20 | 0  | 3  | 0  | 4  | 0  | 0  | 13 |
| U251                   | 2  | 0 | 3  | 8  | 1  | 0  | 1  | 0  | 0  | 1  | 0  |
| <b>Melanoma</b>        |    |   |    |    |    |    |    |    |    |    |    |
| LOX IMVI               | 25 | 0 | 0  | 9  | 0  | 6  | 5  | 5  | 2  | 0  | 10 |
| MALME-3M               | 26 | 0 | 4  | 5  | 6  | 0  | 3  | 12 | 0  | 0  | 0  |
| M14                    | 12 | 0 | 0  | 0  | 0  | 0  | 0  | 6  | 0  | 4  | 0  |
| MDA-MB-435             | 7  | 0 | 1  | 1  | 0  | 0  | 0  | 0  | 0  | 0  | 0  |
| SK-MEL-2               | 0  | 0 | 0  | 0  | 0  | 0  | 0  | 0  | 0  | 0  | 0  |
| SK-MEL-28              | 10 | 0 | 0  | 0  | 0  | 0  | 0  | 0  | 0  | 0  | 0  |
| SK-MEL-5               | 29 | 0 | 2  | 0  | 0  | 0  | 0  | 0  | 0  | 0  | 0  |
| UACC-257               | 0  | 0 | 0  | 0  | 0  | 0  | 0  | 1  | 0  | 10 | 0  |
| UACC-62                | 7  | 0 | 6  | 20 | 17 | 10 | 0  | 8  | 0  | 2  | 3  |
| <b>Ovarian Cancer</b>  |    |   |    |    |    |    |    |    |    |    |    |
| IGROV1                 | 24 | 0 | 0  | 19 | 0  | 1  | 0  | 0  | 14 | 0  | 0  |
| OVCAR-3                | 5  | 0 | 24 | 0  | 0  | 9  | 0  | 0  | 0  | 0  | 0  |
| OVCAR-4                | 36 | 0 | 0  | 34 | 2  | 20 | 0  | 0  | 0  | 0  | 0  |
| OVCAR-5                | 5  | 0 | 0  | 1  | 0  | 0  | 0  | 0  | 0  | 0  | 0  |
| OVCAR-8                | 26 | 0 | 0  | 4  | 0  | 0  | 0  | 0  | 0  | 0  | 0  |
| NCI/ADR-RES            | 21 | 1 | 0  | 8  | 0  | 4  | 1  | 2  | 0  | 0  | 0  |
| SK-OV-3                | 0  | 0 | 0  | 10 | 0  | 12 | 0  | 7  | 0  | 0  | 5  |
| <b>Renal Cancer</b>    |    |   |    |    |    |    |    |    |    |    |    |
| 786-0                  | 11 | 0 | 0  | 4  | 4  | 8  | 0  | 0  | 0  | 0  | 0  |
| A498                   | 0  | 0 | 0  | 0  | 0  | 0  | 0  | 0  | 0  | 0  | 0  |
| ACHN                   | 28 | 0 | 0  | 41 | 0  | 17 | 0  | 0  | 8  | 0  | 18 |
| CAKI-1                 | 9  | 0 | 0  | 38 | 0  | 15 | 5  | 9  | 11 | 4  | 8  |
| RXF 393                | 22 | 5 | 25 | 0  | 0  | 1  | 0  | 8  | 0  | 1  | -  |
| SN12C                  | 17 | 0 | 4  | 22 | 0  | 0  | 1  | 0  | 0  | 4  | 0  |
| TK-10                  | 0  | 0 | 0  | 0  | 3  | 0  | 0  | 0  | 0  | 0  | 0  |
| UO-31                  | 37 | 8 | 12 | 45 | 21 | 33 | 18 | 26 | 26 | 10 | 30 |
| <b>Prostate Cancer</b> |    |   |    |    |    |    |    |    |    |    |    |
| PC-3                   | 23 | 0 | 1  | 19 | 5  | 3  | 9  | 0  | 11 | 0  | 5  |
| DU-145                 | 26 | 0 | 0  | 0  | 0  | 0  | 0  | 0  | 0  | 0  | 0  |
| <b>Breast Cancer</b>   |    |   |    |    |    |    |    |    |    |    |    |
| MCF7                   | 36 | 7 | 15 | 10 | 8  | 10 | 23 | 14 | 10 | 0  | 7  |



<sup>a</sup>The number reported for the one-dose assay, percentage growth inhibition (PGI), is growth relative to the no-drug control, and relative to the time zero number of cells.

CheckCIF files for X-ray data of trimethyl benzo[f]pyrrolo[1,2-a]quinoline-1,2,3-tricarboxylate (**6c**).

**Datablock: anto001tr**

```
R(reflections)= 0.0438( 2583)      wR2(reflections)=
S = 1.032                        0.1266( 3388)
Npar= 265
```

---

The following ALERTS were generated. Each ALERT has the format

**test-name\_ALERT\_alert-type\_alert-level.**

Click on the hyperlinks for more details of the test.

---

 **Alert level C**  
 PLAT911\_ALERT\_3\_C Missing FCF Refl Between Thmin & STh/L= 0.600 2 Report

---

 **Alert level G**  
 PLAT199\_ALERT\_1\_G Reported \_cell\_measurement\_temperature ..... (K) 293 Check  
 PLAT200\_ALERT\_1\_G Reported \_diffn\_ambient\_temperature ..... (K) 293 Check  
 PLAT912\_ALERT\_4\_G Missing # of FCF Reflections Above STh/L= 0.600 66 Note  
 PLAT941\_ALERT\_3\_G Average HKL Measurement Multiplicity ..... 1.9 Low  
 PLAT978\_ALERT\_2\_G Number C-C Bonds with Positive Residual Density. 2 Info

---

0 **ALERT level A** - Most likely a serious problem - resolve or explain  
 0 **ALERT level B** - A potentially serious problem, consider carefully  
 1 **ALERT level C** - Check. Ensure it is not caused by an omission or oversight  
 5 **ALERT level G** - General information/check it is not something unexpected

2 ALERT type 1 CIF construction/syntax error, inconsistent or missing data  
 1 ALERT type 2 Indicator that the structure model may be wrong or deficient  
 2 ALERT type 3 Indicator that the structure quality may be low  
 1 ALERT type 4 Improvement, methodology, query or suggestion  
 0 ALERT type 5 Informative message, check

---

It is advisable to attempt to resolve as many as possible of the alerts in all categories. Often the minor alerts point to easily fixed oversights, errors and omissions in your CIF or refinement strategy, so attention to these fine details can be worthwhile. In order to resolve some of the more serious problems it may be necessary to carry out additional measurements or structure refinements. However, the purpose of your study may justify the reported deviations and the more serious of these should normally be commented upon in the discussion or experimental section of a paper or in the "special\_details" fields of the CIF. checkCIF was carefully designed to identify outliers and unusual parameters, but every test has its limitations and alerts that are not important in a particular case may appear. Conversely, the absence of alerts does not guarantee there are no aspects of the results needing attention. It is up to the individual to critically assess their own results and, if necessary, seek expert advice.

#### **Publication of your CIF in IUCr journals**

A basic structural check has been run on your CIF. These basic checks will be run on all CIFs submitted for publication in IUCr journals (*Acta Crystallographica*, *Journal of Applied Crystallography*, *Journal of Synchrotron Radiation*); however, if you intend to submit to *Acta Crystallographica Section C* or *E* or *IUCrData*, you should make sure that full publication checks are run on the final version of your CIF prior to submission.

#### **Publication of your CIF in other journals**

Please refer to the *Notes for Authors* of the relevant journal for any special instructions relating to CIF submission.

---

**PLATON version of 12/09/2022; check.def file version of 09/08/2022**

Datablock onto001tr -ellipsoid plot

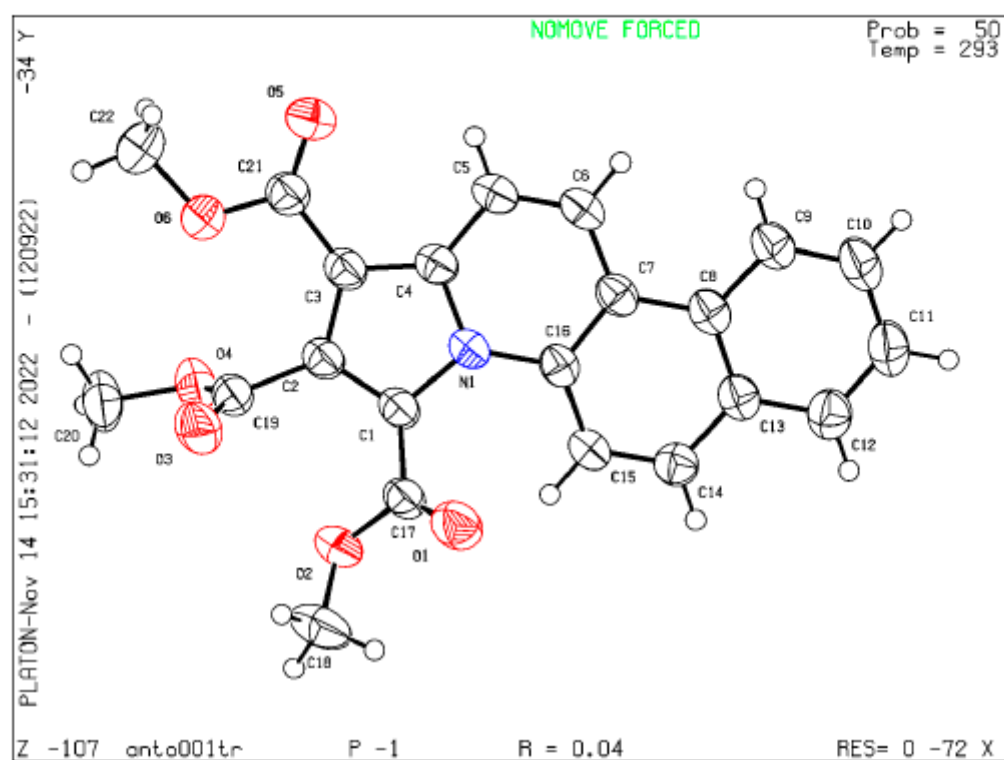

CheckCIF files for X-ray data of ethyl  
9,14-dioxo-9,14-dihydrobenzo[f]benzo[5,6]isoindolo[2,1-a]quinoline-15-carboxylate (7c).

## checkCIF/PLATON report

Structure factors have been supplied for datablock(s) anto002tr

THIS REPORT IS FOR GUIDANCE ONLY. IF USED AS PART OF A REVIEW PROCEDURE FOR PUBLICATION, IT SHOULD NOT REPLACE THE EXPERTISE OF AN EXPERIENCED CRYSTALLOGRAPHIC REFEREE.

No syntax errors found. CIF dictionary Interpreting this report

### Datablock: anto002tr

Bond precision: C-C = 0.0030 Å Wavelength=1.54184  
Cell: a=6.9814(4) b=11.3238(8) c=13.1202(9)  
alpha=78.690(6) beta=75.608(6) gamma=81.707(5)  
Temperature: 293 K

|                        | Calculated   | Reported     |
|------------------------|--------------|--------------|
| Volume                 | 980.18(12)   | 980.18(12)   |
| Space group            | P -1         | P -1         |
| Hall group             | -P 1         | -P 1         |
| Moiety formula         | C27 H17 N O4 | C27 H17 N O4 |
| Sum formula            | C27 H17 N O4 | C27 H17 N O4 |
| Mr                     | 419.42       | 419.42       |
| Dx, g cm <sup>-3</sup> | 1.421        | 1.421        |
| Z                      | 2            | 2            |
| Mu (mm <sup>-1</sup> ) | 0.781        | 0.781        |
| F000                   | 436.0        | 436.0        |
| F000'                  | 437.37       |              |
| h, k, lmax             | 8, 13, 16    | 8, 13, 16    |
| Nref                   | 3770         | 3685         |
| Tmin, Tmax             | 0.945, 0.969 | 0.734, 1.000 |
| Tmin'                  | 0.544        |              |

Correction method= # Reported T Limits: Tmin=0.734 Tmax=1.000  
AbsCorr = GAUSSIAN

Data completeness= 0.977 Theta(max)= 70.862

R(reflections)= 0.0453( 2678) wR2(reflections)=  
0.1353( 3685)  
S = 1.029 Npar= 290

---

The following ALERTS were generated. Each ALERT has the format

**test-name\_ALERT\_alert-type\_alert-level.**

Click on the hyperlinks for more details of the test.

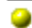

#### Alert level C

|                   |                  |                        |       |                                 |      |        |
|-------------------|------------------|------------------------|-------|---------------------------------|------|--------|
| PLAT220_ALERT_2_C | NonSolvent       | Resd 1                 | C     | Ueq(max)/Ueq(min) Range         | 3.8  | Ratio  |
| PLAT222_ALERT_3_C | NonSolvent       | Resd 1                 | H     | Uiso(max)/Uiso(min) Range       | 4.1  | Ratio  |
| PLAT242_ALERT_2_C | Low              | 'MainMol'              |       | Ueq as Compared to Neighbors of | C26  | Check  |
| PLAT360_ALERT_2_C | Short            | C(sp3)-C(sp3) Bond     | C26   | - C27                           | 1.38 | Ang.   |
| PLAT911_ALERT_3_C | Missing FCF Refl | Between Thmin & STh/L= | 0.600 |                                 | 6    | Report |

---

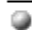

#### Alert level G

|                   |                                        |                                     |  |  |      |        |
|-------------------|----------------------------------------|-------------------------------------|--|--|------|--------|
| PLAT003_ALERT_2_G | Number of Uiso or Uij                  | Restrained non-H Atoms ...          |  |  | 1    | Report |
| PLAT063_ALERT_4_G | Crystal Size                           | Possibly too Large for Beam Size .. |  |  | 0.78 | mm     |
| PLAT186_ALERT_4_G | The CIF-Embedded .res File             | Contains ISOR Records               |  |  | 1    | Report |
| PLAT199_ALERT_1_G | Reported _cell_measurement_temperature | ..... (K)                           |  |  | 293  | Check  |
| PLAT200_ALERT_1_G | Reported _diffn_ambient_temperature    | ..... (K)                           |  |  | 293  | Check  |
| PLAT333_ALERT_2_G | Large Aver C6-Ring C-C Dist            | C2 -C11                             |  |  | 1.44 | Ang.   |
| PLAT860_ALERT_3_G | Number of Least-Squares                | Restraints .....                    |  |  | 6    | Note   |
| PLAT912_ALERT_4_G | Missing # of FCF Reflections           | Above STh/L= 0.600                  |  |  | 80   | Note   |
| PLAT941_ALERT_3_G | Average HKL Measurement                | Multiplicity .....                  |  |  | 2.0  | Low    |
| PLAT978_ALERT_2_G | Number C-C Bonds with                  | Positive Residual Density.          |  |  | 0    | Info   |

---

- 0 **ALERT level A** - Most likely a serious problem - resolve or explain  
 0 **ALERT level B** - A potentially serious problem, consider carefully  
 5 **ALERT level C** - Check. Ensure it is not caused by an omission or oversight  
 10 **ALERT level G** - General information/check it is not something unexpected
- 2 ALERT type 1 CIF construction/syntax error, inconsistent or missing data  
 6 ALERT type 2 Indicator that the structure model may be wrong or deficient  
 4 ALERT type 3 Indicator that the structure quality may be low  
 3 ALERT type 4 Improvement, methodology, query or suggestion  
 0 ALERT type 5 Informative message, check
-

It is advisable to attempt to resolve as many as possible of the alerts in all categories. Often the minor alerts point to easily fixed oversights, errors and omissions in your CIF or refinement strategy, so attention to these fine details can be worthwhile. In order to resolve some of the more serious problems it may be necessary to carry out additional measurements or structure refinements. However, the purpose of your study may justify the reported deviations and the more serious of these should normally be commented upon in the discussion or experimental section of a paper or in the "special\_details" fields of the CIF. checkCIF was carefully designed to identify outliers and unusual parameters, but every test has its limitations and alerts that are not important in a particular case may appear. Conversely, the absence of alerts does not guarantee there are no aspects of the results needing attention. It is up to the individual to critically assess their own results and, if necessary, seek expert advice.

#### **Publication of your CIF in IUCr journals**

A basic structural check has been run on your CIF. These basic checks will be run on all CIFs submitted for publication in IUCr journals (*Acta Crystallographica*, *Journal of Applied Crystallography*, *Journal of Synchrotron Radiation*); however, if you intend to submit to *Acta Crystallographica Section C* or *E* or *IUCrData*, you should make sure that [full publication checks](#) are run on the final version of your CIF prior to submission.

#### **Publication of your CIF in other journals**

Please refer to the *Notes for Authors* of the relevant journal for any special instructions relating to CIF submission.

---

**PLATON version of 12/09/2022; check.def file version of 09/08/2022**



Datablock onto002tr -ellipsoid plot

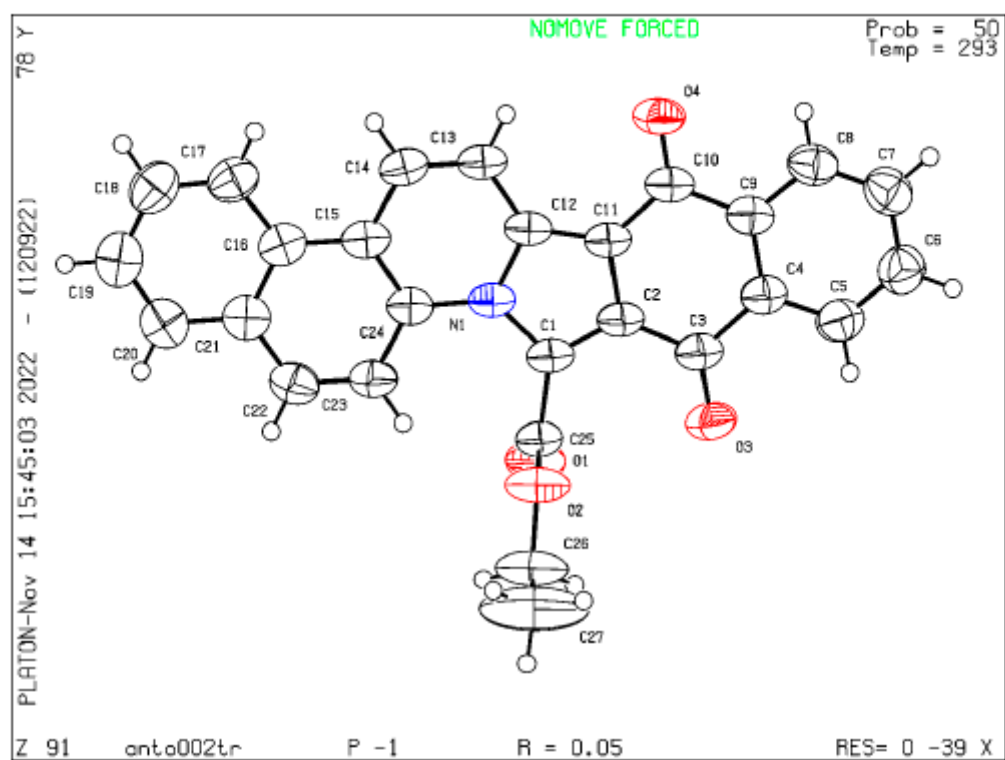

Supplement: s1 [file s1]
